# Supplementary material
Source: PubMed Central journal article supplement (PMC3758785)

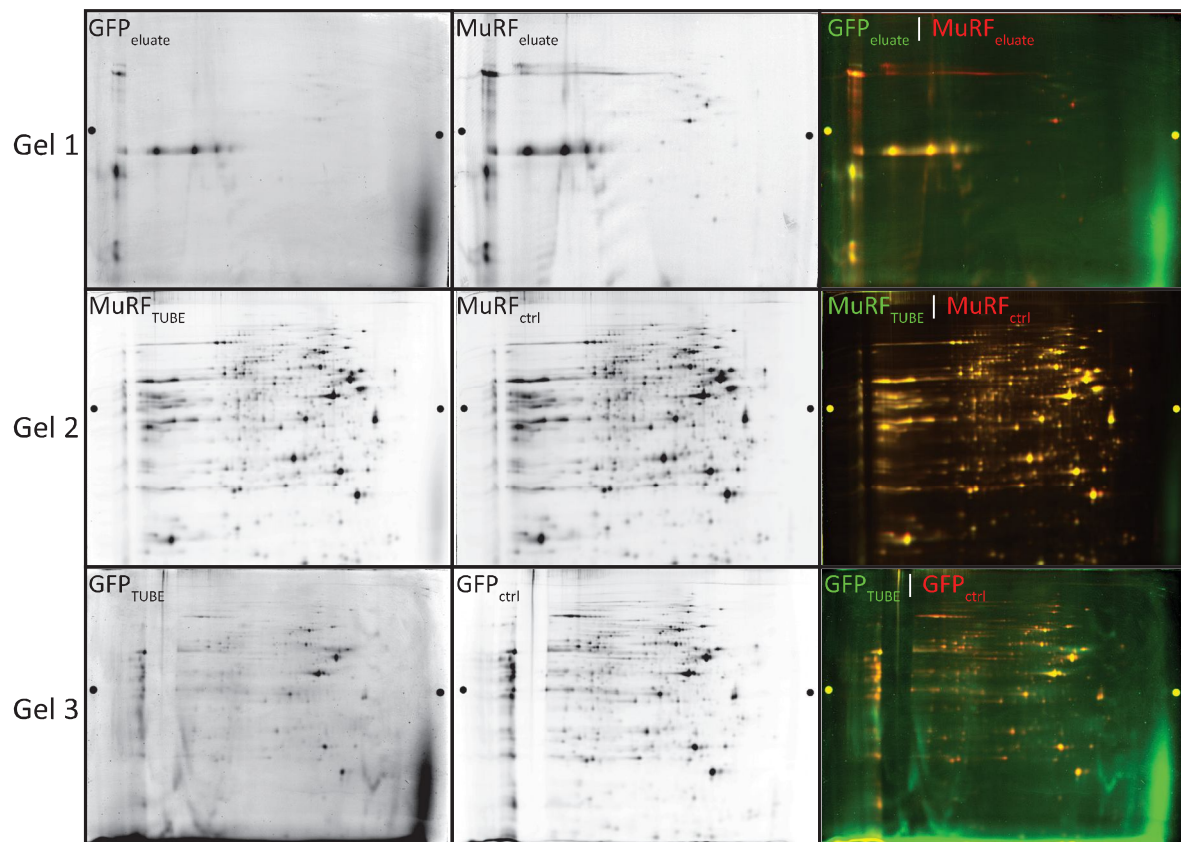

Supplementary Figure 1

Rubel & Schisler *et al.*

**A**

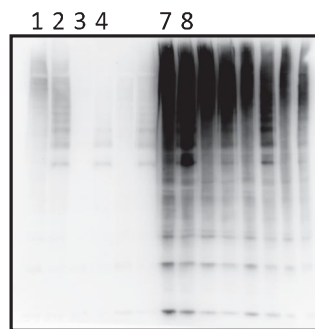

**B**

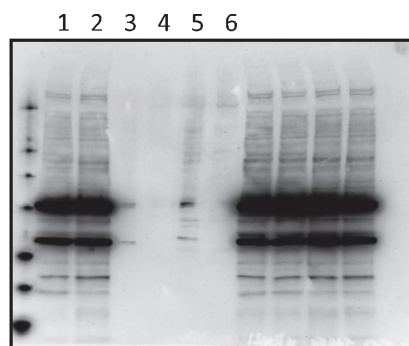

Supplement: NIHMS483685-supplement-12013_2013_9624_MOESM3_ESM.pdf [file NIHMS483685-supplement-12013_2013_9624_MOESM3_ESM.pdf]
